# Supplementary material for: Production of renewable long-chained cycloalkanes from biomass-derived furfurals and cyclic ketones
Source: Royal Society of Chemistry journal article supplement (doi:10.1039/c8ra01723a), 2018-01-01
Supplement: c8ra01723a1.pdf [file c8ra01723a1.pdf]

Supplementary material

**Production of renewable long-chained cycloalkanes from  
biomass-derived furfurals and cyclic ketones**

Qiyang Liu <sup>a,\*</sup>, Caihong Zhang<sup>a,b</sup>, Ning Shi <sup>a,b</sup>, Xinghua Zhang<sup>a,\*</sup>, Chenguang Wang <sup>a</sup>, Longlong

Ma <sup>a</sup>

<sup>a</sup> *CAS Key Laboratory of Renewable Energy, Guangzhou Institute of Energy Conversion, Chinese*

*Academy of Sciences, Guangzhou, 510650, P. R. China and*

<sup>b</sup> *University of Chinese Academy of Sciences, Beijing, 100049, P. R. China*

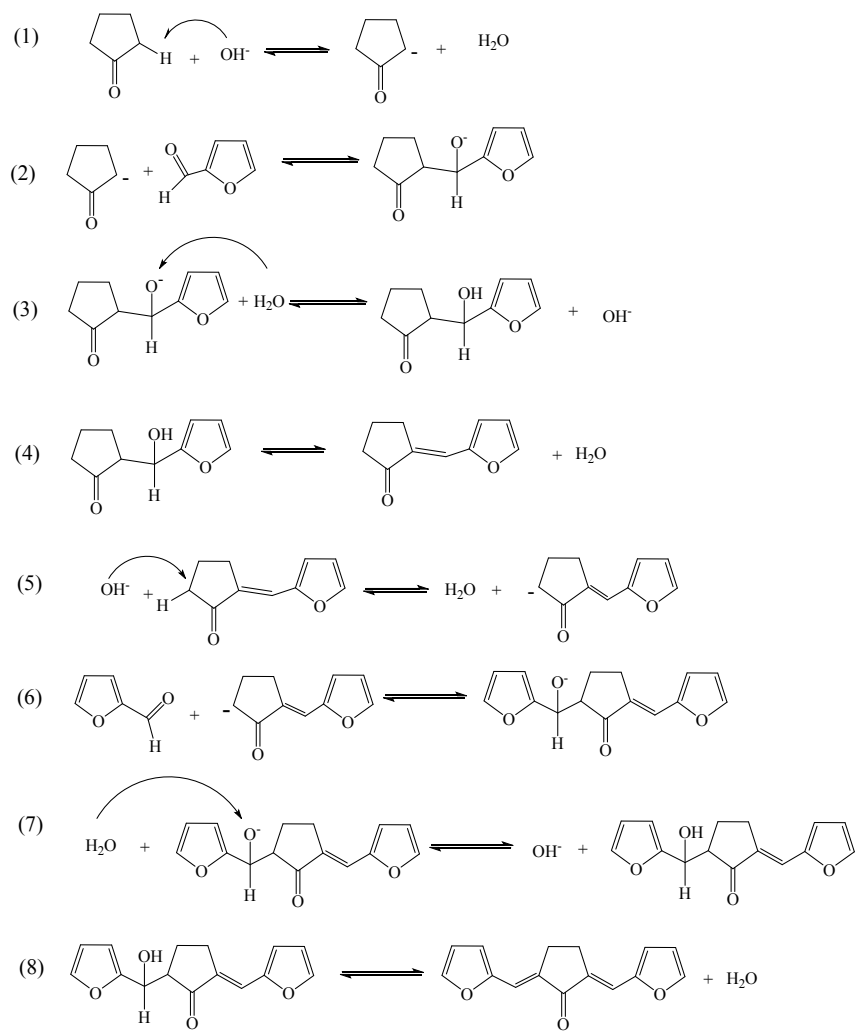

Scheme S1 Formation mechanism of FF-CP-FF by aldol condensation of CP and FF.

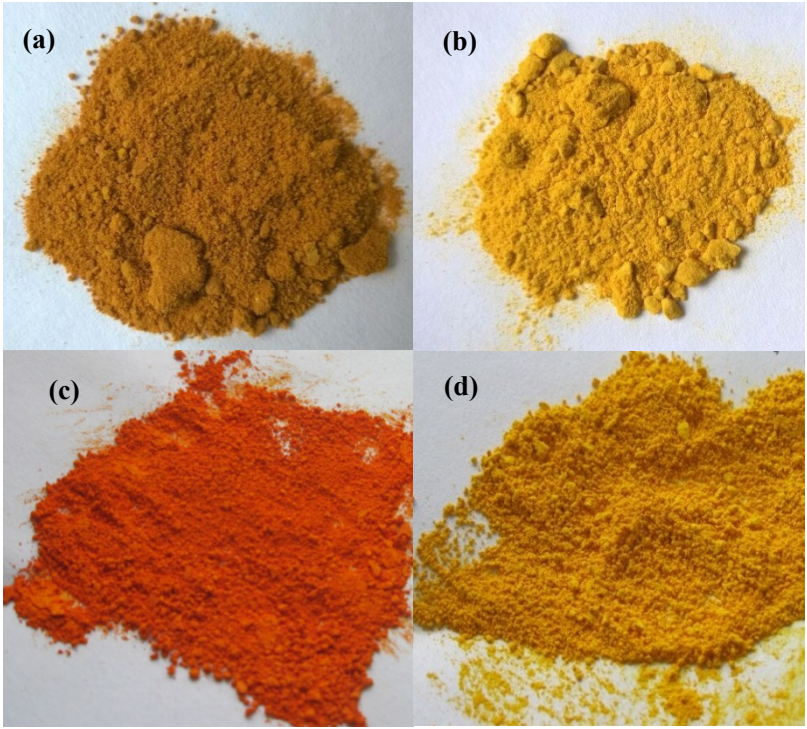

Fig. S1 Photographs of the condensation intermediates: (a) FF-CP-FF; (b) FF-CH-FF; (c) HMF-CP-HMF; (d) HMF-CH-HMF.

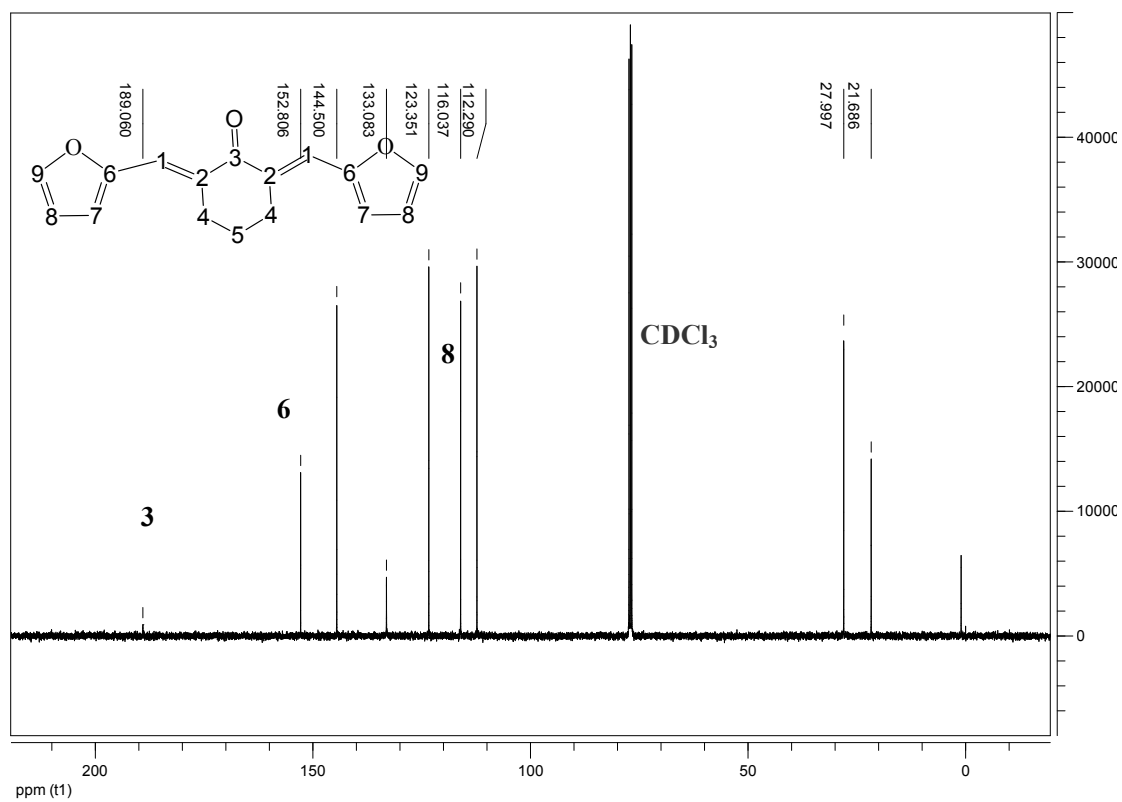

Fig. S2 The  $^{13}\text{C}$  NMR spectrum of FF-CH-FF.

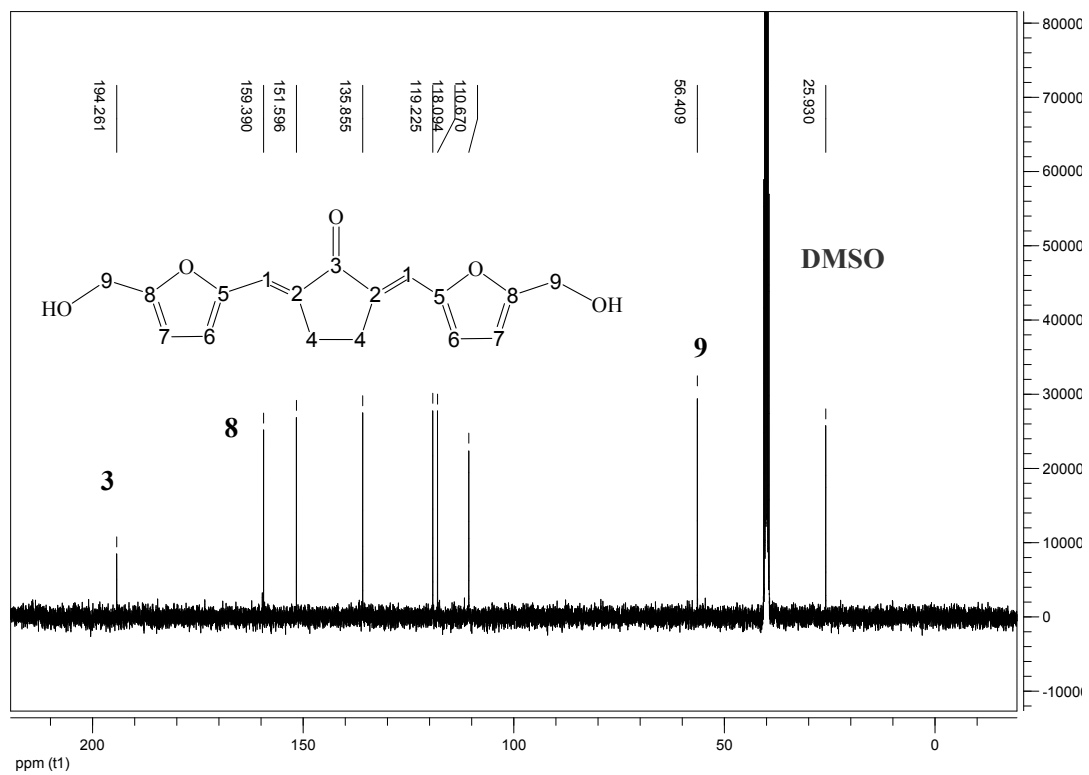

Fig. S3 The  $^{13}\text{C}$  NMR spectrum of HMF-CP-HMF.

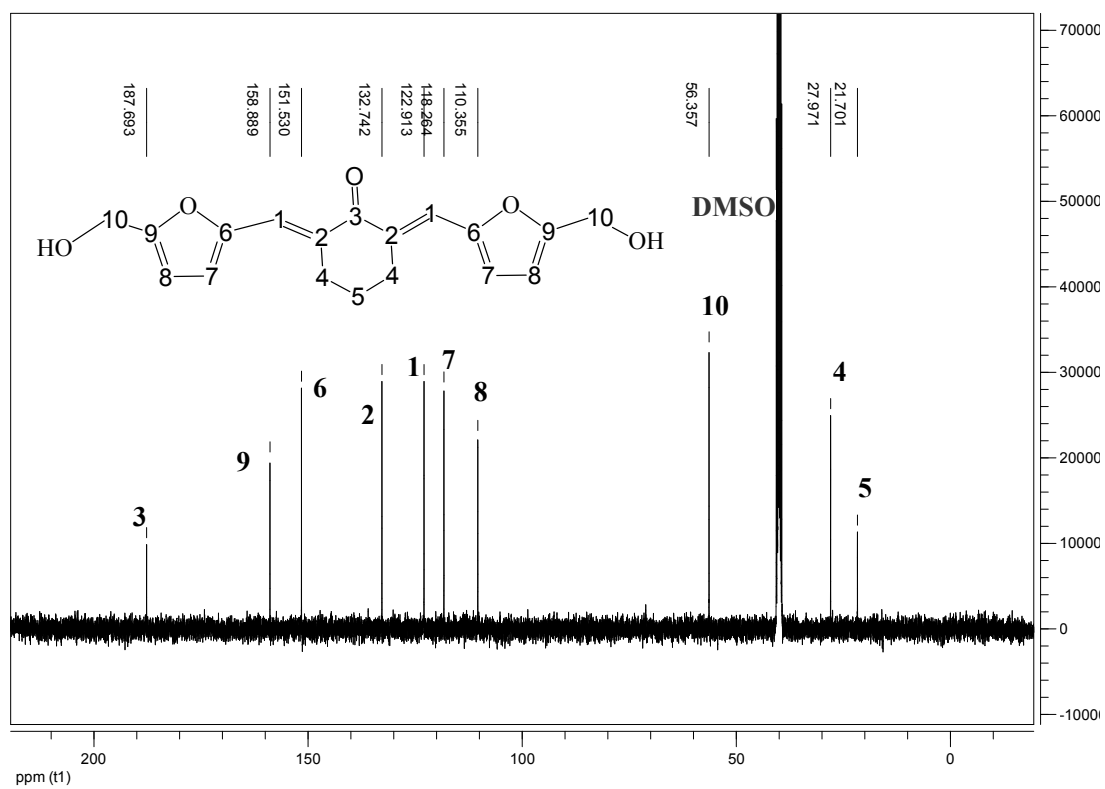

Fig. S4 The  $^{13}\text{C}$  NMR spectrum of HMF-CH-HMF.

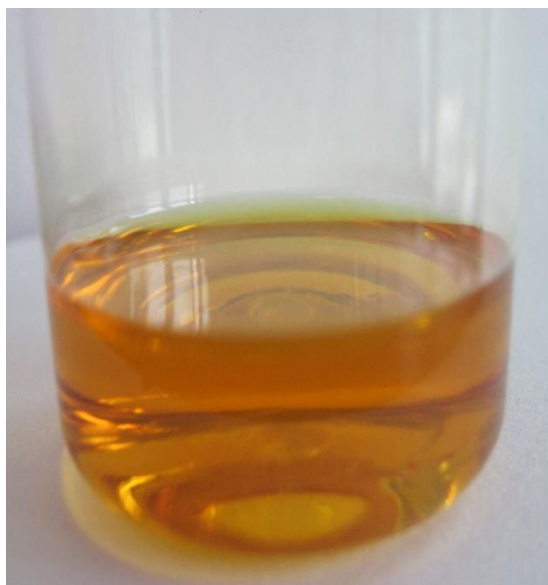

Fig. S5 Photograph of intermediate produced by FF-CP-FF hydrogenation at 150 °C over Pd/C.  
Reaction condition: 1 mmol FF-CP-FF, 15 mL H<sub>2</sub>O, 0.05g Pd/C, 4 MPa H<sub>2</sub>, 3 h.



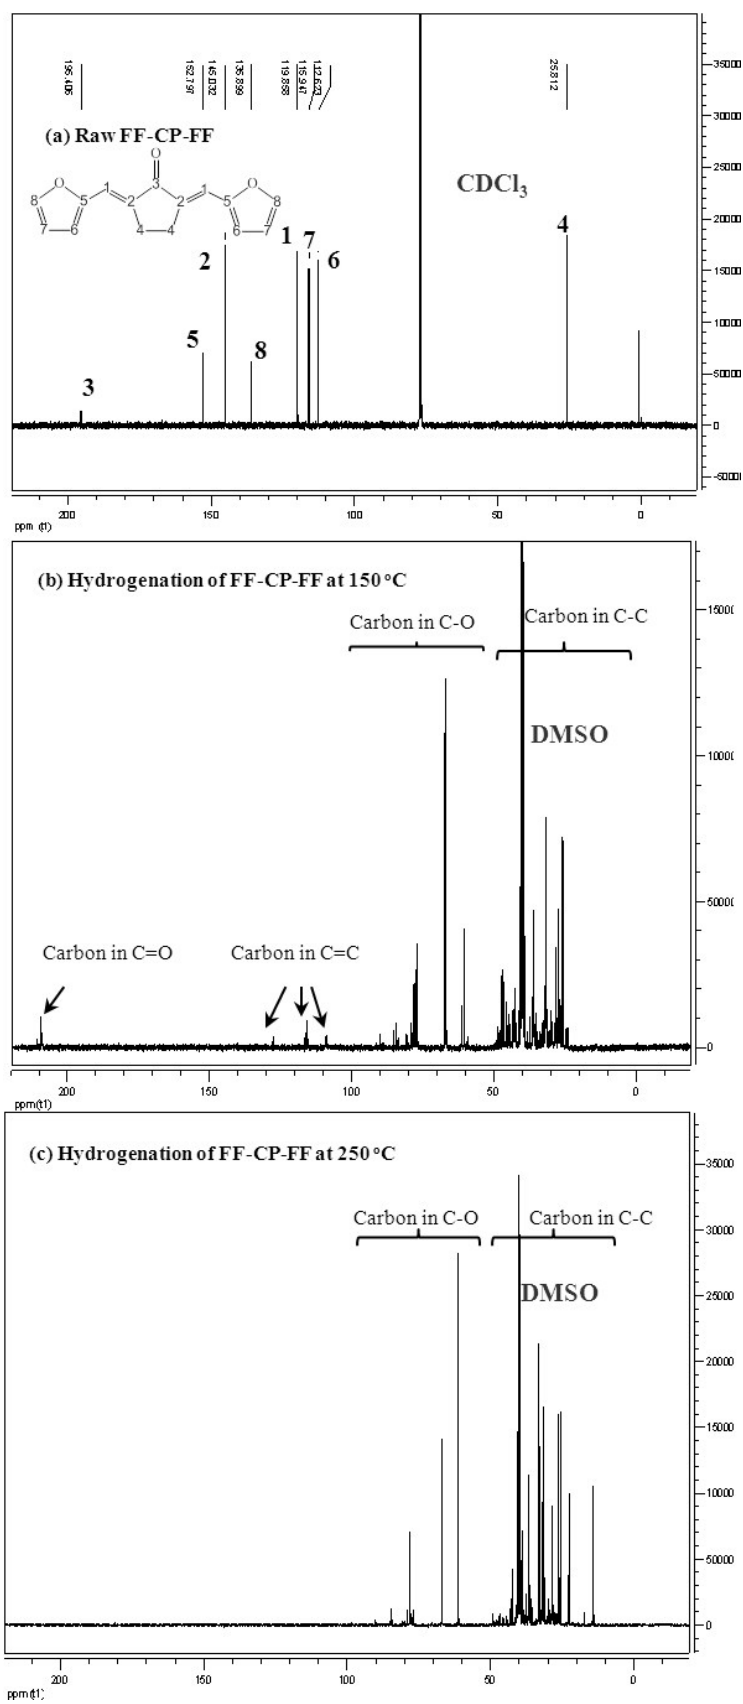

Fig. S6 The <sup>13</sup>C NMR spectra of hydrogenated products from FF-CP-FF at different temperatures. Reaction condition: 1 mmol FF-CP-FF, 15 mL H<sub>2</sub>O, 0.05g Pd/C, 4 MPa H<sub>2</sub>, 3 h.

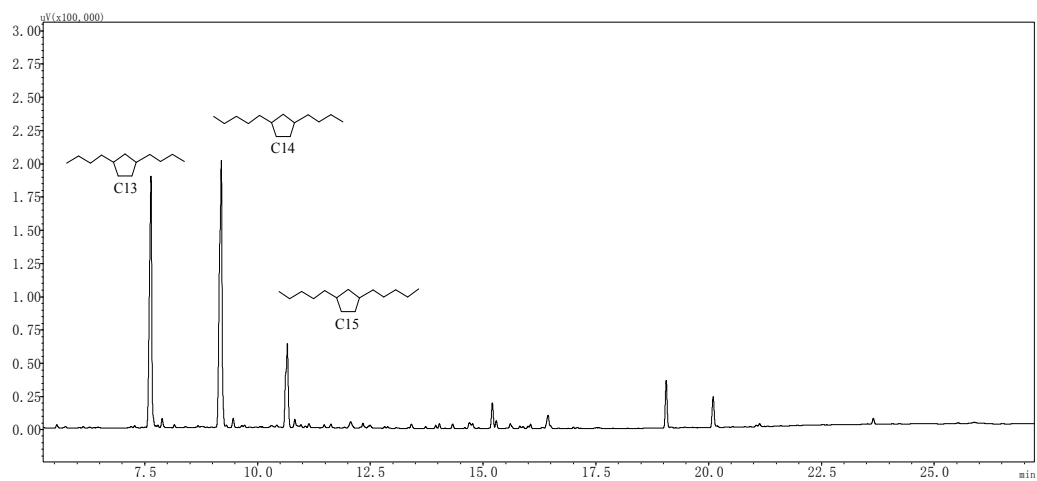

Fig. S7 Representative GC result from hydrodeoxygenation of FF-CP-FF. Reaction conditions: 1.0 mmol FF-CP-FF, 15 mL H<sub>2</sub>O, 0.05 g Pd/C, 0.10 g ZrP, 300 °C, 3 h and 4 MPa H<sub>2</sub> pressure.
